# Supplementary material for: Complementary congruent and opposite neurons achieve concurrent multisensory integration and segregation
Source: eLife journal article supplement (doi:10.7554/elife.43753), 2019-05-23
Supplement: supp [file elife-43753-supp-v1.zip]

Archive with 5 entries (5 files):
- elife_poa_e43753_Transparent_Reporting_File.pdf
- elife_poa_e43753_Figure_6_figure_supplement_2.eps
- elife_poa_e43753_Figure_6_figure_supplement_1.eps
- elife_poa_e43753_Figure_8_figure_supplement_1.eps
- elife_poa_e43753_Figure_1_figure_supplement_1.eps
